# Supplementary material for: Early versus delayed initiation of renal replacement therapy for acute kidney injury: an updated systematic review, meta-analysis, meta-regression and trial sequential analysis of randomized controlled trials
Source: PubMed Central journal article supplement (PMC6180467; doi:10.5935/0103-507x.20180054), 2018
Supplement: rbti-30-03-0376-suppl1.pdf [file rbti-30-03-0376-suppl1.pdf]

# Early *versus* delayed initiation of renal replacement therapy for acute kidney injury: an updated systematic review, meta-analysis, meta-regression and trial sequential analysis of randomized controlled trials

*Início precoce em comparação ao início tardio da terapia de substituição renal para lesão renal aguda: revisão sistemática atualizada, metanálise, metarregressão e análise sequencial de ensaios clínicos randomizados e controlados*

Fabio Tanzillo Moreira<sup>1</sup>, Henrique Palomba<sup>1</sup>, Renato Carneiro de Freitas Chaves<sup>1</sup>, Catherine Bouman<sup>2</sup>, Marcus Josephus Schultz<sup>2,3</sup>, Ary Serpa Neto<sup>1,2</sup>

**Table 1S** - Characteristics of the included studies and patients at the beginning of renal replacement therapy

| Study                           | Type of RRT     |                 | Fluid balance (mL)      |                         | Dose of RRT (mL/kg/h)          |             | Serum creatinine (mg/dL) |            | Urine output (mL)  |                    |
|---------------------------------|-----------------|-----------------|-------------------------|-------------------------|--------------------------------|-------------|--------------------------|------------|--------------------|--------------------|
|                                 | Early           | Late            | Early                   | Late                    | Early                          | Late        | Early                    | Late       | Early              | Late               |
| Zarbock et al. <sup>(6)</sup>   | CVVHDF          | CVVHDF          | 6811<br>(3897 - 10,189) | 6334<br>(3951 - 10,700) | 26.6 ± 4.7                     | 26.6 ± 5.8  | 1.9 ± 0.6                | 2.4 ± 1.0  | 445<br>(175 - 807) | 270<br>(112 - 670) |
| Gaudry et al. <sup>(7)</sup>    | IHD, CRRT       | IHD, CRRT       | NR                      | NR                      | NR                             | NR          | 3.3 ± 1.4                | 5.3 ± 2.3  | NR                 | 150<br>(50 - 600)  |
| Bouman et al. <sup>(11)</sup>   | CVVHF           | CVVHF           | NR                      | NR                      | 52 ± 16 (high)<br>20 ± 4 (low) | 19 ± 4      | NR                       | NR         | NR                 | NR                 |
| Sugahara et al. <sup>(12)</sup> | CVVHD           | CVVHD           | NR                      | NR                      | NR                             | NR          | 2.9 ± 0.2                | 3.0 ± 0.2  | 696 ± 24           | 432 ± 24           |
| Jamale et al. <sup>(13)</sup>   | IHD             | IHD             | NR                      | NR                      | NR                             | NR          | 7.4 ± 5.3                | 10.4 ± 3.3 | 429 ± 388          | 376 ± 350          |
| Wald et al. <sup>(14)</sup>     | IHD, SLED, CRRT | IHD, SLED, CRRT | 5144<br>(2440 - 7006)   | 4821<br>(3149 - 7761)   | 28.6 ± 8.0                     | 24.7 ± 28.6 | 3.7 ± 1.3                | 4.6 ± 2.2  | 400<br>(211 - 568) | 265<br>(80 - 755)  |

RRT - renal replacement therapy; CVVHF - continuous venovenous hemofiltration; NR - not reported; CVVHD - continuous venovenous hemodialysis; IHD - intermittent hemodialysis; SLED - sustained low efficiency dialysis; CRRT - continuous renal replacement therapy; CVVHDF - continuous venovenous hemodiafiltration.

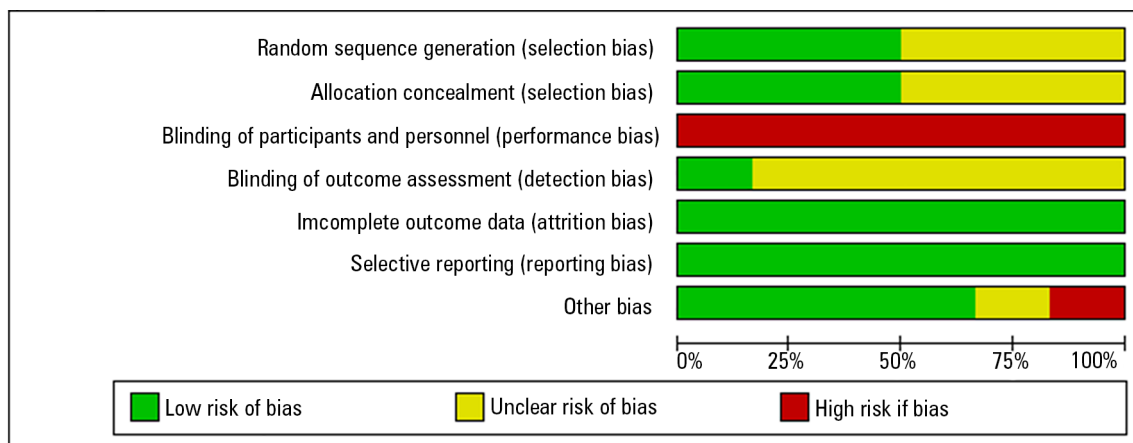

**Figure 1S** - Risk of bias graph.

|               | Random sequence generation (selection bias) | Allocation concealment (selection bias) | Blinding of participants and personnel (performance bias) | Blinding of outcome assessment (detection bias) | Incomplete outcome data (attrition bias) | Selective reporting (reporting bias) | Other bias |
|---------------|---------------------------------------------|-----------------------------------------|-----------------------------------------------------------|-------------------------------------------------|------------------------------------------|--------------------------------------|------------|
| Bouman 2002   | ?                                           | ?                                       | -                                                         | ?                                               | +                                        | +                                    | +          |
| Gaundry 2016  | +                                           | +                                       | -                                                         | ?                                               | +                                        | +                                    | +          |
| Jamale 2013   | +                                           | +                                       | -                                                         | +                                               | +                                        | +                                    | +          |
| Sugahara 2004 | ?                                           | ?                                       | -                                                         | ?                                               | +                                        | +                                    | -          |
| Wald 2015     | ?                                           | ?                                       | -                                                         | ?                                               | +                                        | +                                    | ?          |
| Zarbock 2016  | +                                           | +                                       | -                                                         | ?                                               | +                                        | +                                    | +          |

Figure 2S - Risk of bias summary.

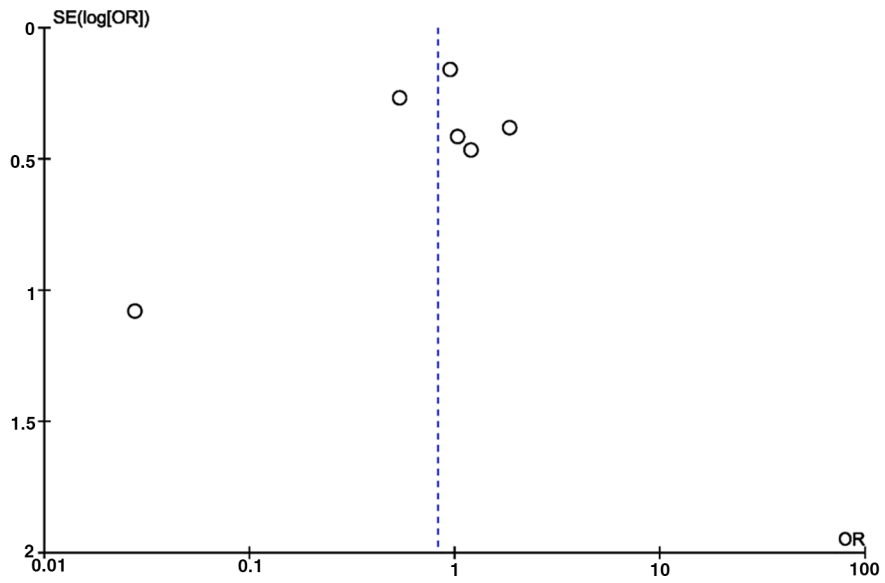

Figure 3S - Funnel plot for the primary outcome.

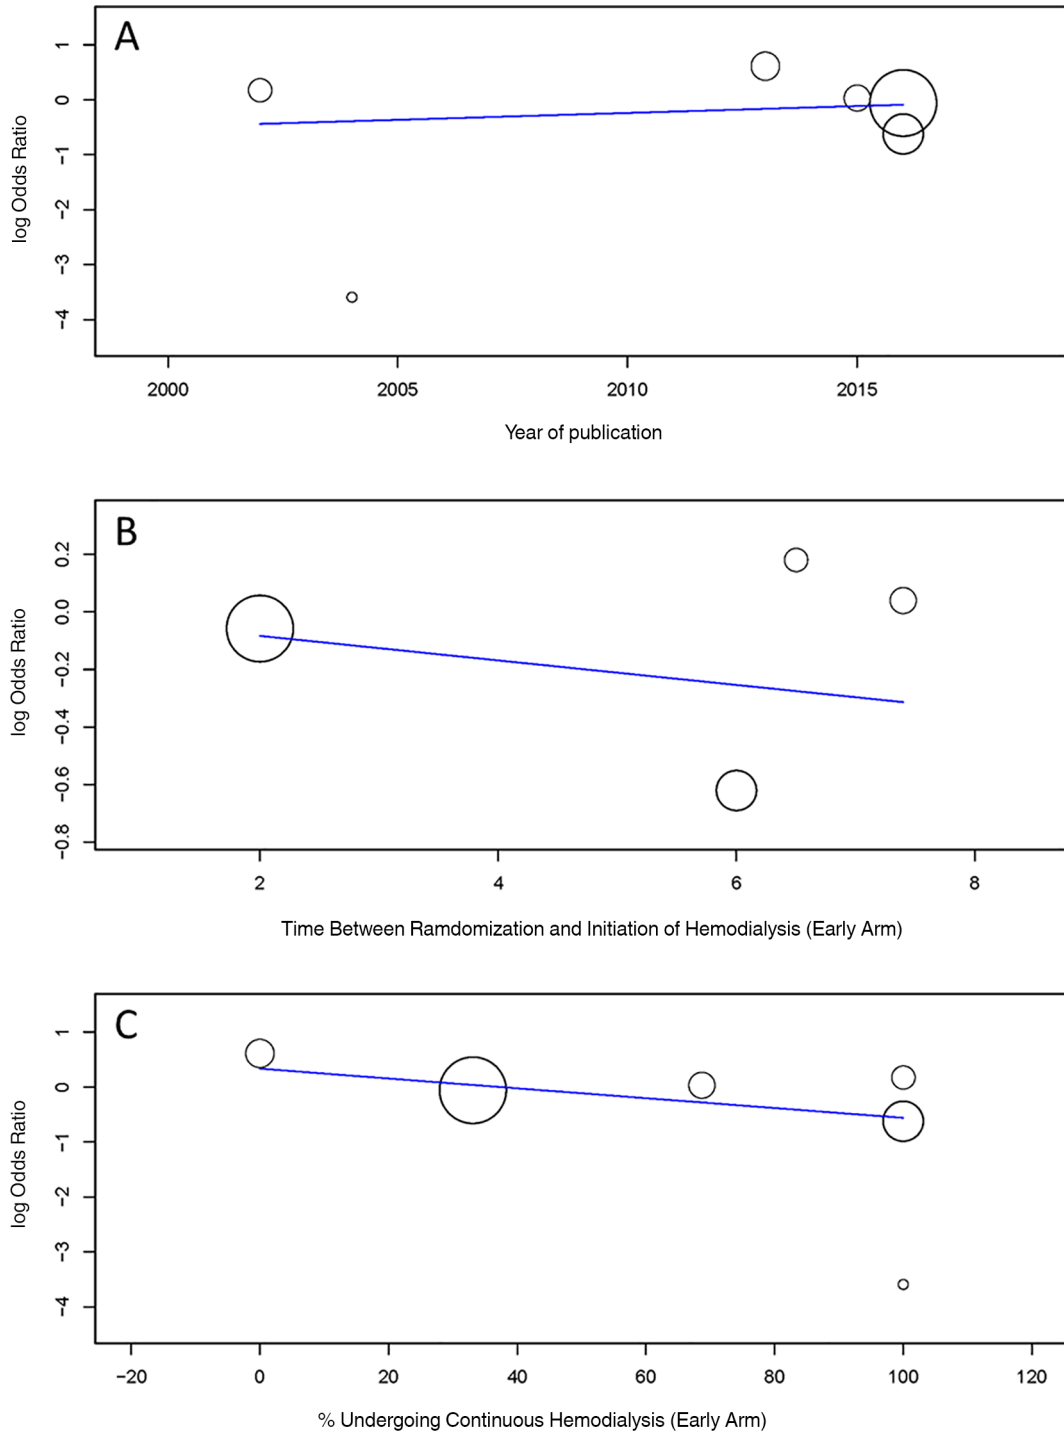

**Figure 4S** - Meta-regression analyses for mortality at the longest follow-up using (A) the publication year, (B) the time between randomization and initiation of renal replacement therapy in the early arm, and (C) the percentage of patients receiving the continuous method of renal replacement therapy in the early arm as covariates.

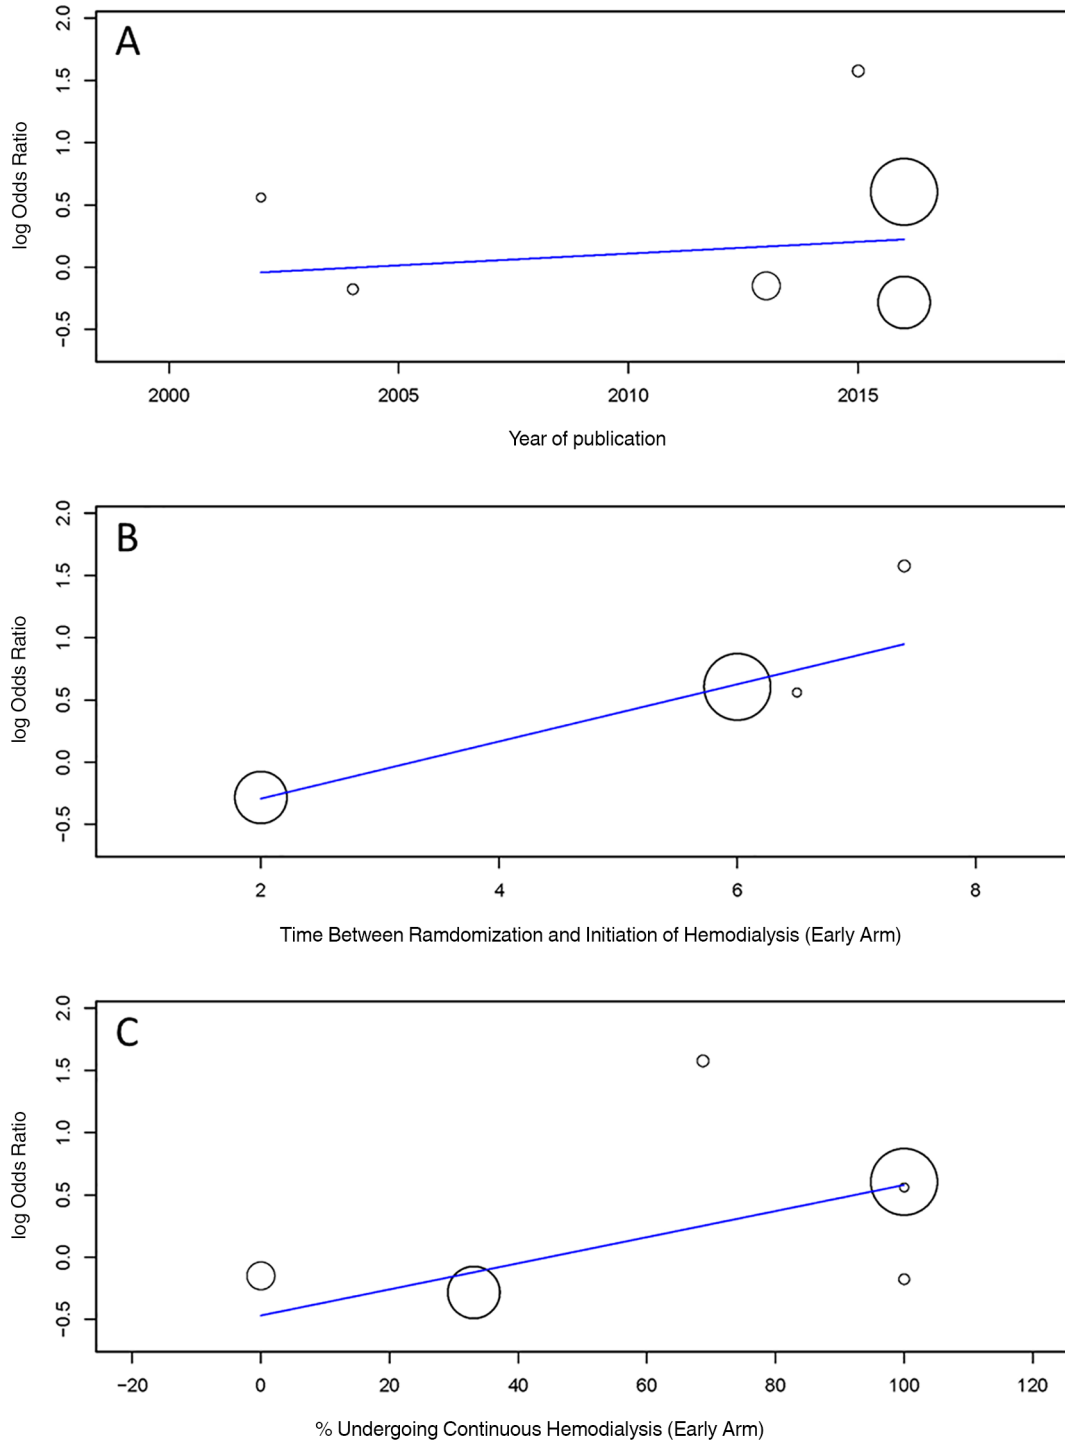

**Figure 5S** - Meta-regression analyses for renal function recovery at the longest follow-up using (A) the publication year, (B) the time between randomization and initiation of renal replacement therapy in the early arm, and (C) the percentage of patients receiving the continuous method of renal replacement therapy in the early arm as covariates.

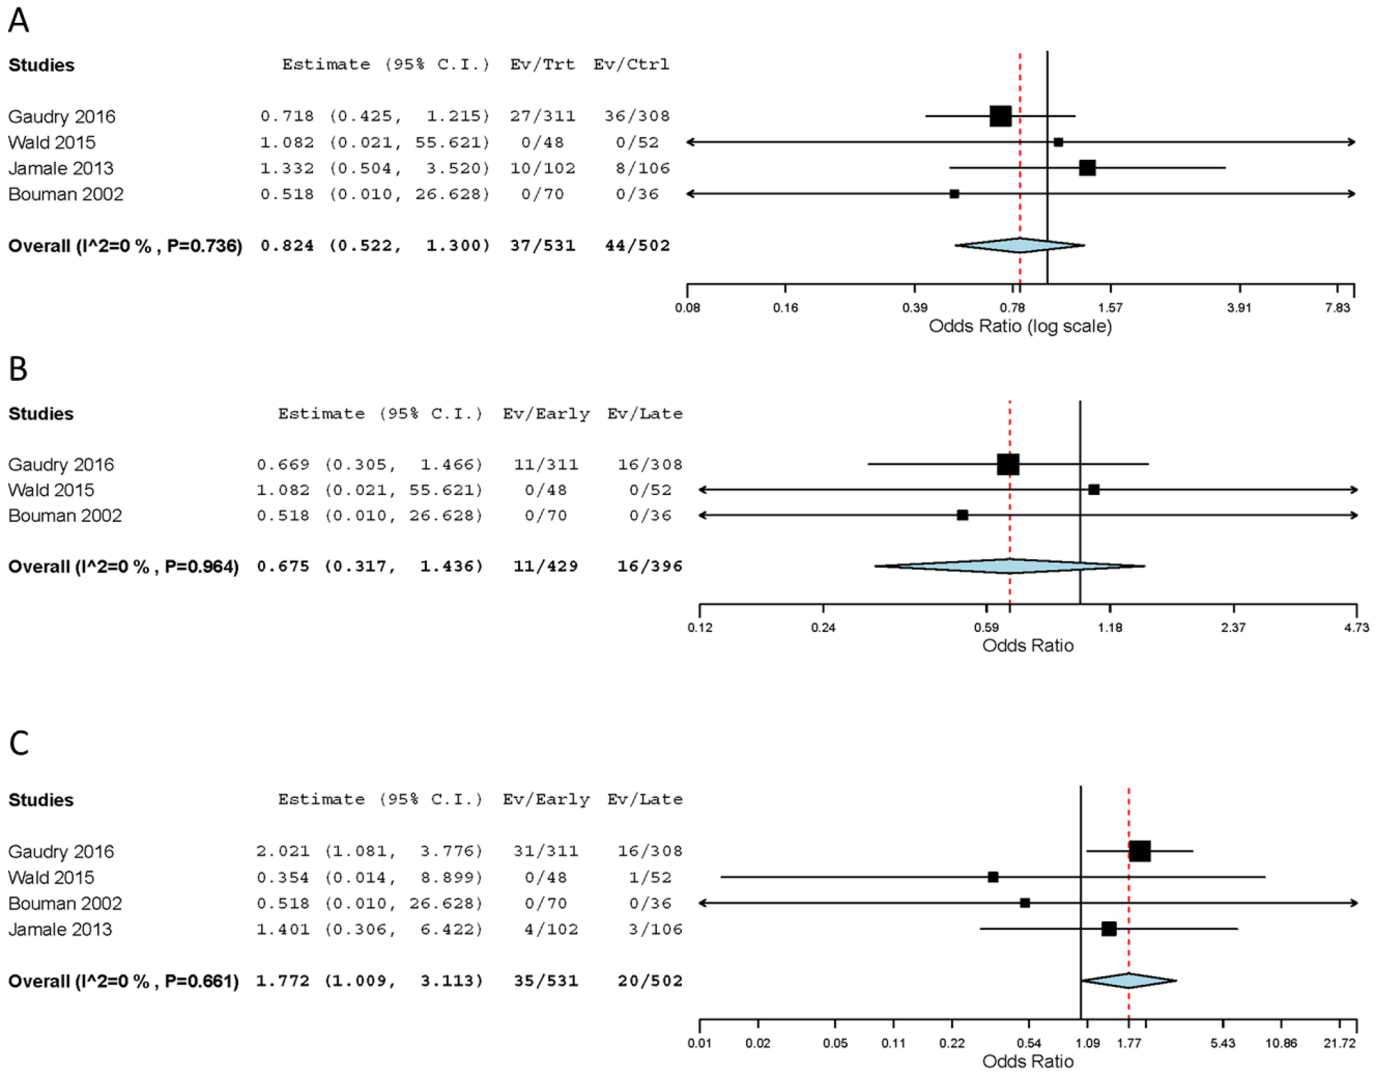

**Figure 6S** - Forest plots for (A) bleeding, (B) thrombosis, and (C) catheter-related bloodstream infections.

**A**

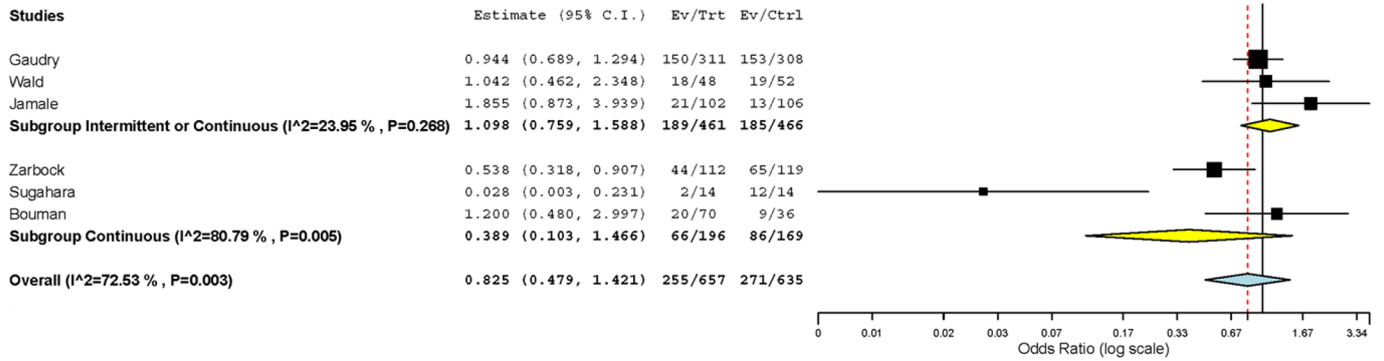

**B**

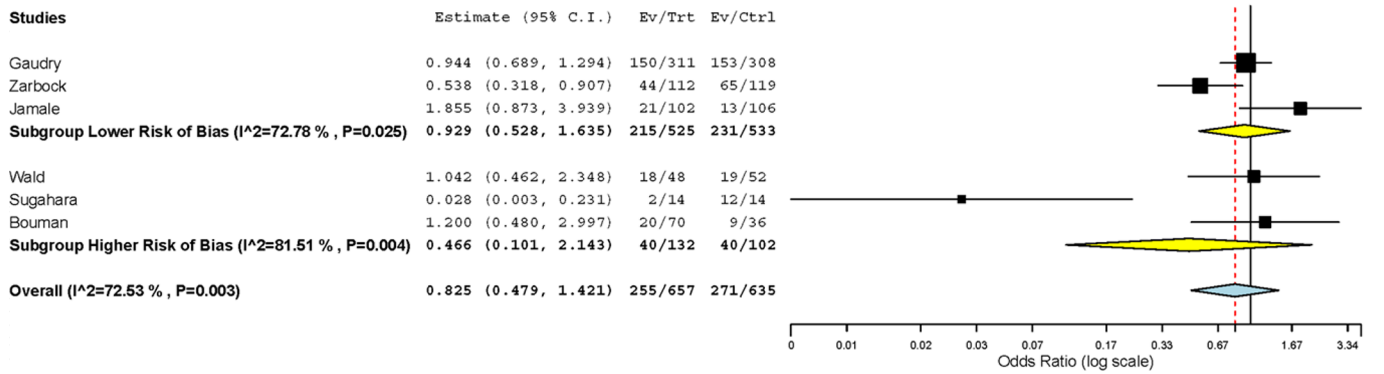

**Figure 7S** - Forest plots showing the effects of early renal replacement therapy initiation on mortality at the longest follow-up according to the (A) type of renal replacement therapy used (exclusively continuous vs intermittent or continuous) and to the (B) risk of bias (lower vs higher).

**A**

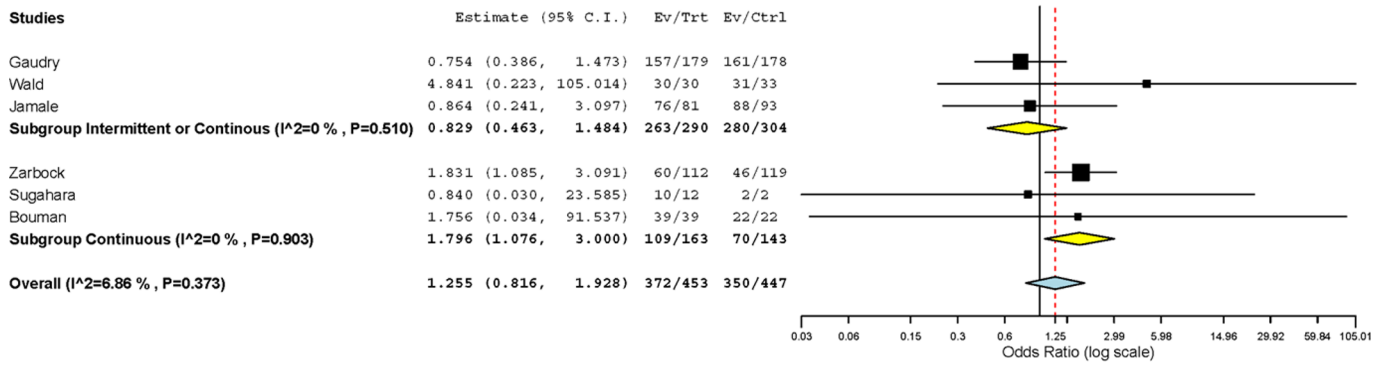

**B**

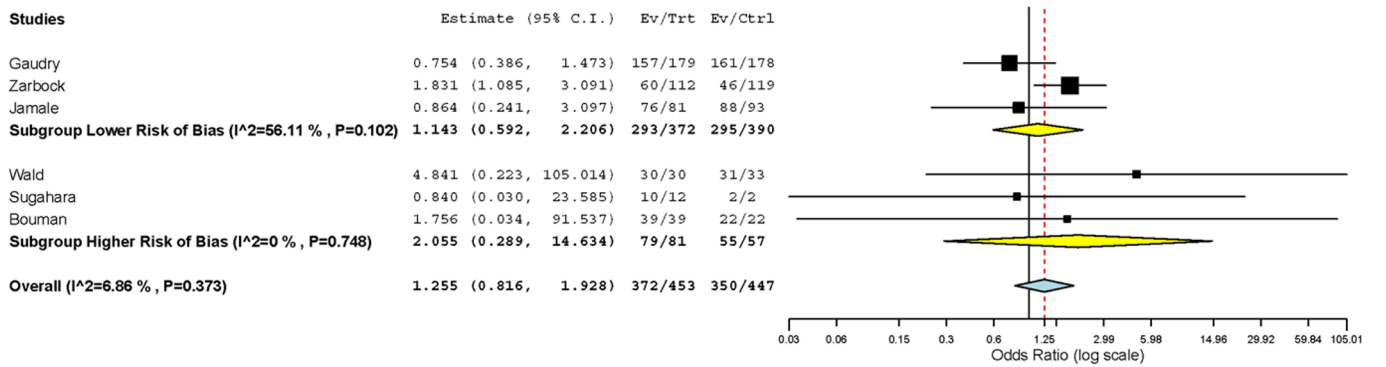

**Figure 8S** - Forest plots showing the effects of early renal replacement therapy initiation on renal function recovery at the longest follow-up according to the (A) type of renal replacement therapy used (exclusively continuous vs intermittent or continuous) and to the (B) risk of bias (lower vs higher).
